# Supplementary material
Source: PubMed Central journal article supplement (PMC2610329)
Supplement: rsif20080320s02.pdf [file rsif20080320s02.pdf]

Supplementary Table 1: Descriptions of the proto-oncoproteins and housekeeping proteins used in the category 1 comparison. Protein sequences were gathered from the Swiss-Prot database (www.expasy.org).

| Proto-oncoproteins |                                            | Housekeeping proteins |                                 |
|--------------------|--------------------------------------------|-----------------------|---------------------------------|
| Accession          | Acronym and description                    | Accession             | Acronym and description         |
| P51587             | BRCA2 Breast cancer susceptibility protein | P04075                | ALDOA Aldolase A                |
| P10721             | KIT Mast/stem cell growth factor receptor  | P06744                | GPI Glucose phosphate isomerase |
| P08581             | MET Hepatocyte growth factor receptor      | P00558                | PGK1 Phosphoglycerate kinase 1  |
| P07949             | RET Tyrosine-protein kinase receptor       | O14548                | COX7A2L Cytochrome c oxidase    |
| P04637             | TP53 Cellular tumor antigen p53            | P84098                | RPL19 Ribosomal protein L19     |
| P07332             | FES Tyrosine-protein kinase                | P60709                | ACTB Actin, beta                |
| P06241             | FYN Tyrosine-protein kinase                | P08133                | ANXA6 Annexin A6                |
| Q9UM73             | ALK Tyrosine kinase receptor               | O75506                | HSBP1 HSF binding protein 1     |
| P04629             | NTRK1 Nerve growth factor receptor         | P07199                | CENPB Centromere protein B      |
| Q05397             | FAK1 Focal adhesion kinase 1               | P12109                | COL6A1 Collagen, type VI        |
| P08922             | ROS Tyrosine-protein kinase                | P15954                | COX7C Cytochrome c oxidase      |
| P04626             | ERBB2 Receptor tyrosine-protein kinase     | P35222                | CTNNB1 Catenin                  |
| P16591             | FER Tyrosine-protein kinase                | P04406                | GAPDH G3P dehydrogenase         |
| P42684             | ABL2 Tyrosine-protein kinase               | P35579                | MYH9 Myosin, non-muscle         |
| P09769             | FGR Tyrosine-protein kinase                | P62988                | RPS27A Ribosomal protein S27a   |
| P12931             | SRC Tyrosine-protein kinase                | Q5QNW6                | HIST1H2BC Histone H2bc          |
| P07947             | YES1 Tyrosine-protein kinase               | O15371                | EIF3S7 Translation IF           |
| P38398             | BRCA1 Breast cancer susceptibility protein | O43707                | ACTN4 Actinin, alpha 4          |
| P11362             | FGFR1 Fibroblast growth factor receptor 1  | P00338                | LDHA Lactate dehydrogenase A    |
| O60674             | JAK2 Tyrosine-protein kinase               | P08238                | HSP90AB1 Heat shock protein     |

Supplementary Table 2: GO terms describing the housekeeping proteins used in the category 1 comparison. The number of human proteins described by each GO term is indicated. The final column indicates whether or not a given GO term was used in one of the category 2 comparisons (those with ten or more corresponding proteins).

| Accession | Description                                                          | # of proteins |     |
|-----------|----------------------------------------------------------------------|---------------|-----|
| GO0000122 | negative regulation of transcription from RNA polymerase II promoter | 127           | Yes |
| GO0000910 | cytokinesis                                                          | 19            | Yes |
| GO0001525 | angiogenesis                                                         | 78            | Yes |
| GO0001837 | epithelial to mesenchymal transition                                 | 11            | Yes |
| GO0005975 | carbohydrate metabolic process                                       | 211           | Yes |
| GO0006091 | generation of precursor metabolites and energy                       | 83            | Yes |
| GO0006096 | glycolysis                                                           | 59            | Yes |
| GO0006412 | translation                                                          | 277           | Yes |
| GO0006446 | regulation of translational initiation                               | 20            | Yes |
| GO0006509 | membrane protein ectodomain proteolysis                              | 11            | Yes |
| GO0006928 | cell motility                                                        | 126           | Yes |
| GO0006941 | striated muscle contraction                                          | 32            | Yes |
| GO0006959 | humoral immune response                                              | 32            | Yes |
| GO0006986 | response to unfolded protein                                         | 49            | Yes |
| GO0007049 | cell cycle                                                           | 232           | Yes |
| GO0007155 | cell adhesion                                                        | 421           | Yes |
| GO0007229 | integrin-mediated signaling pathway                                  | 62            | Yes |
| GO0007411 | axon guidance                                                        | 47            | Yes |
| GO0007599 | hemostasis                                                           | 6             |     |
| GO0008360 | regulation of cell shape                                             | 26            | Yes |
| GO0015031 | protein transport                                                    | 284           | Yes |
| GO0016310 | phosphorylation                                                      | 13            | Yes |
| GO0016567 | protein ubiquitination                                               | 37            | Yes |
| GO0030048 | actin filament-based movement                                        | 12            | Yes |
| GO0030220 | platelet formation                                                   | 2             |     |
| GO0030224 | monocyte differentiation                                             | 3             |     |
| GO0030433 | ER-associated protein catabolic process                              | 11            | Yes |
| GO0030521 | androgen receptor signaling pathway                                  | 35            | Yes |
| GO0031532 | actin cytoskeleton reorganization                                    | 8             |     |
| GO0032417 | positive regulation of sodium-hydrogen antiporter activity           | 1             |     |
| GO0042062 | long-term strengthening of neuromuscular junction                    | 2             |     |
| GO0042981 | regulation of apoptosis                                              | 84            | Yes |
| GO0043534 | blood vessel endothelial cell migration                              | 1             |     |
| GO0045429 | positive regulation of nitric oxide biosynthetic process             | 8             |     |
| GO0045893 | positive regulation of transcription, DNA-dependent                  | 23            | Yes |
| GO0045941 | positive regulation of transcription                                 | 32            | Yes |
| GO0048167 | regulation of synaptic plasticity                                    | 6             |     |
| GO0050900 | leukocyte migration                                                  | 7             |     |
| GO0051272 | positive regulation of cell motility                                 | 4             |     |
| GO0060070 | Wnt receptor signaling pathway through beta-catenin                  | 5             |     |

Supplementary Table 3: Tyrosine kinases used in the category 3 comparison. All protein sequences were gathered from the Swiss-Prot database (www.expasy.org). The table includes the Swiss-Prot accession number and a short description of the protein.

| <b>Proto-oncogenic tyrosine kinases</b> |                                                           |
|-----------------------------------------|-----------------------------------------------------------|
| <b>Accession</b>                        | <b>Acronym and description</b>                            |
| P00519                                  | ABL1 Proto-oncogene                                       |
| P42684                                  | ABL2 Tyrosine-protein kinase                              |
| Q07912                                  | ACK1 activated CDC42 kinase 1                             |
| Q9UM73                                  | ALK tyrosine kinase receptor                              |
| P30530                                  | AXL/UFO Tyrosine-protein kinase receptor                  |
| P51813                                  | BMX Cytoplasmic tyrosine-protein kinase                   |
| Q13882                                  | PTK6/BRK Tyrosine-protein kinase 6                        |
| P41240                                  | CSK Tyrosine-protein kinase                               |
| P42679                                  | MATK/CTK Megakaryocyte-associated tyrosine-protein kinase |
| Q08345                                  | DDR1 Epithelial discoidin domain-containing receptor 1    |
| Q16832                                  | DDR2 Discoidin domain-containing receptor 2               |
| P00533                                  | EGFR Epidermal growth factor receptor                     |
| P21709                                  | EPHA1 Ephrin type-A receptor 1                            |
| P29317                                  | EPHA2 Ephrin type-A receptor 2                            |
| P29320                                  | EPHA3 Ephrin type-A receptor 3                            |
| P54764                                  | EPHA4 Ephrin type-A receptor 4                            |
| P54756                                  | EPHA5 Ephrin type-A receptor 5                            |
| Q15375                                  | EPHA7 Ephrin type-A receptor 7                            |
| P54760                                  | EPHB4 Ephrin type-B receptor 4                            |
| Q05397                                  | FAK1 Focal adhesion kinase 1                              |
| P16591                                  | FER Proto-oncogene tyrosine-protein kinase                |
| P07332                                  | FES roto-oncogene tyrosine-protein kinase Fes/Fps         |
| P11362                                  | FGFR1 Basic fibroblast growth factor receptor 1           |
| P21802                                  | FGFR2 Fibroblast growth factor receptor 2                 |
| P22607                                  | FGFR3 Fibroblast growth factor receptor 3                 |
| P22455                                  | FGFR4 Fibroblast growth factor receptor 4                 |
| P09769                                  | FGR Proto-oncogene tyrosine-protein kinase                |
| P17948                                  | VGFR1 Vascular endothelial growth factor receptor 1       |
| P36888                                  | FLT3 FL cytokine receptor                                 |
| P35916                                  | VGFR3 Vascular endothelial growth factor receptor 3       |
| P07333                                  | CSF1R Macrophage colony-stimulating factor 1 receptor     |
| P06241                                  | FYN Proto-oncogene tyrosine-protein kinase                |
| P04626                                  | ERBB2 Receptor tyrosine-protein kinase                    |
| P21860                                  | ERBB3 Receptor tyrosine-protein kinase                    |
| Q15303                                  | ERBB4 Receptor tyrosine-protein kinase                    |
| P08069                                  | IGF1R Insulin-like growth factor 1 receptor               |
| P23458                                  | JAK1 Tyrosine-protein kinase                              |
| O60674                                  | JAK2 Tyrosine-protein kinase                              |
| P52333                                  | JAK3 Tyrosine-protein kinase                              |
| P35968                                  | VGFR2 Vascular endothelial growth factor receptor 2       |
| P10721                                  | KIT Mast/stem cell growth factor receptor                 |
| P06239                                  | LCK Proto-oncogene tyrosine-protein kinase                |
| P07948                                  | LYN Tyrosine-protein kinase                               |

Supplementary Table 3 (continued)

| <b>Accession</b>                            | <b>Acronym and description</b>                                                 |
|---------------------------------------------|--------------------------------------------------------------------------------|
| Q12866                                      | MERTK Proto-oncogene tyrosine-protein kinase                                   |
| P08581                                      | MET Hepatocyte growth factor receptor                                          |
| P16234                                      | PGFRA Alpha platelet-derived growth factor receptor                            |
| P09619                                      | PGFRB Beta platelet-derived growth factor receptor                             |
| Q14289                                      | FAK2 Protein tyrosine kinase 2 beta                                            |
| P07949                                      | RET Proto-oncogene tyrosine-protein kinase receptor                            |
| Q04912                                      | RON Macrophage-stimulating protein receptor                                    |
| P08922                                      | ROS Proto-oncogene tyrosine-protein kinase                                     |
| P12931                                      | SRC Proto-oncogene tyrosine-protein kinase                                     |
| P43405                                      | KSYK Tyrosine-protein kinase                                                   |
| Q6J9G0                                      | STYK1 Tyrosine protein-kinase                                                  |
| P04629                                      | NTRK1 High affinity nerve growth factor receptor                               |
| Q16620                                      | NTRK2 BDNF/NT-3 growth factors receptor                                        |
| Q16288                                      | NTRK3 NT-3 growth factor receptor                                              |
| P07947                                      | YES Proto-oncogene tyrosine-protein kinase                                     |
| <b>Non-proto-oncogenic tyrosine kinases</b> |                                                                                |
| P51451                                      | BLK Tyrosine-protein kinase                                                    |
| Q06187                                      | BTK Tyrosine-protein kinase                                                    |
| Q13308                                      | PTK7 Tyrosine-protein kinase-like 7                                            |
| Q5JZY3                                      | EPHAA Ephrin type-A receptor 10                                                |
| Q9UF33                                      | EPHA6 Ephrin type-A receptor 6                                                 |
| P29322                                      | EPHA8 Ephrin type-A receptor 8                                                 |
| P54762                                      | EPHB1 Ephrin type-B receptor 1                                                 |
| P29323                                      | EPHB2 Ephrin type-B receptor 2                                                 |
| P54753                                      | EPHB3 Ephrin type-B receptor 3                                                 |
| O15197                                      | EPHB6 Ephrin type-B receptor 6                                                 |
| P42685                                      | FRK Tyrosine-protein kinase                                                    |
| P08631                                      | HCK Tyrosine-protein kinase                                                    |
| P06213                                      | INSR Insulin receptor                                                          |
| P14616                                      | INSRR Insulin receptor-related protein                                         |
| Q08881                                      | ITK Tyrosine-protein kinase                                                    |
| Q6ZMQ8                                      | LMTK1 Serine/threonine-protein kinase / Apoptosis-associated tyrosine kinase 1 |
| Q8IWU2                                      | LMTK2 Serine/threonine-protein kinase / Apoptosis-associated tyrosine kinase 2 |
| Q96Q04                                      | LMTK3 Serine/threonine-protein kinase / Apoptosis-associated tyrosine kinase 3 |
| P29376                                      | LTK Leukocyte tyrosine kinase receptor                                         |
| O15146                                      | MUSK Muscle, skeletal receptor tyrosine protein kinase                         |
| Q01973                                      | ROR1 Tyrosine-protein kinase transmembrane receptor                            |
| Q01974                                      | ROR2 Tyrosine-protein kinase transmembrane receptor                            |
| P34925                                      | RYK Tyrosine-protein kinase                                                    |
| Q9H3Y6                                      | SRMS Tyrosine-protein kinase                                                   |
| P42680                                      | TEC Tyrosine-protein kinase                                                    |
| P35590                                      | TIE1 Tyrosine-protein kinase receptor                                          |
| Q02763                                      | TIE2 Angiopoietin-1 receptor                                                   |
| Q13470                                      | TNK1 Non-receptor tyrosine-protein kinase                                      |
| P42681                                      | TXK Tyrosine-protein kinase                                                    |
| P29597                                      | TYK2 Non-receptor tyrosine-protein kinase                                      |
| Q06418                                      | TYRO3 Tyrosine-protein kinase receptor                                         |
| P43403                                      | ZAP70 Tyrosine-protein kinase                                                  |

Supplementary Table 4: Complete data for the category 1 comparison. For each definition of a rare k-mer, and for each value of k (5, 6, and 7), the P-value is given, which shows whether there was a statistically significant difference in rare k-mer frequency between the control set and the proto-oncoprotein set. The P/C columns indicate which set contained a higher frequency of rare k-mers—the proto-oncoprotein set (P) or the control set (C).

|               | <b>0 times</b> |            | <b>≤ 2 times</b> |            | <b>≤ 5 times</b> |            |
|---------------|----------------|------------|------------------|------------|------------------|------------|
|               | <b>P-value</b> | <b>P/C</b> | <b>P-value</b>   | <b>P/C</b> | <b>P-value</b>   | <b>P/C</b> |
| <b>5-mers</b> | 0.0165         | P          | 5.78e-07         | P          | 3.85e-06         | P          |
| <b>6-mers</b> | 0.00473        | P          | 6.97e-05         | P          | 3.68e-06         | P          |
| <b>7-mers</b> | 8.19e-08       | P          | 6.64e-07         | P          | 4.24e-06         | P          |

Supplementary Table 5: Individual results for each category 2 comparison for 5-mers. For each definition of a rare 5-mer, the P-value is given, which shows whether there was a statistically significant difference in rare 5-mer frequency between that GO protein set and the proto-oncoprotein set. The P/C columns indicate which set contained a higher frequency of rare 5-mers—the proto-oncoprotein set (P) or the control set (C). If this difference was not statistically significant, (n.s.) is appended.

| Accession | 0 times  |          | < 2 times |          | < 5 times |          |
|-----------|----------|----------|-----------|----------|-----------|----------|
|           | P-value  | P/C      | P-value   | P/C      | P-value   | P/C      |
| GO0000122 | 2.57e-05 | P        | 1.23e-11  | P        | 8.98e-24  | P        |
| GO0000910 | 7.04e-08 | P        | 1.37e-21  | P        | 9.57e-43  | P        |
| GO0001525 | 0.85     | C (n.s.) | 0.592     | P (n.s.) | 0.0694    | P (n.s.) |
| GO0001837 | 0.948    | C (n.s.) | 0.167     | C (n.s.) | 0.114     | C (n.s.) |
| GO0005975 | 3.26e-06 | C        | 2.26e-12  | C        | 1.65e-15  | C        |
| GO0006091 | 0.948    | C (n.s.) | 0.303     | C (n.s.) | 0.844     | P (n.s.) |
| GO0006096 | 0.217    | P (n.s.) | 0.136     | P (n.s.) | 0.802     | C (n.s.) |
| GO0006412 | 0.0478   | P        | 0.0424    | P        | 0.00959   | P        |
| GO0006446 | 2.98e-10 | P        | 5.4e-20   | P        | 1.36e-27  | P        |
| GO0006509 | 1.49e-05 | P        | 2.8e-05   | P        | 2.88e-07  | P        |
| GO0006928 | 0.00211  | P        | 3.24e-05  | P        | 8.09e-07  | P        |
| GO0006941 | 1.42e-16 | P        | 1.59e-27  | P        | 1.57e-30  | P        |
| GO0006959 | 1.29e-07 | P        | 3.91e-14  | P        | 1.51e-16  | P        |
| GO0006986 | 1.39e-19 | P        | 1.19e-26  | P        | 6.32e-26  | P        |
| GO0007049 | 4.52e-20 | P        | 6.52e-29  | P        | 3.13e-36  | P        |
| GO0007155 | 0.000458 | P        | 7.74e-09  | P        | 1.54e-11  | P        |
| GO0007229 | 0.00108  | P        | 0.0244    | P        | 0.364     | P (n.s.) |
| GO0007411 | 0.666    | C (n.s.) | 0.71      | P (n.s.) | 0.927     | C (n.s.) |
| GO0008360 | 3.68e-16 | P        | 1.13e-34  | P        | 1.09e-45  | P        |
| GO0015031 | 6.86e-10 | P        | 8.21e-17  | P        | 2.33e-20  | P        |
| GO0016310 | 0.212    | P (n.s.) | 0.00772   | P        | 0.0347    | P        |
| GO0016567 | 0.401    | P (n.s.) | 0.511     | P (n.s.) | 0.435     | P (n.s.) |
| GO0030048 | 2.96e-12 | P        | 8.3e-18   | P        | 3.92e-27  | P        |
| GO0030433 | 0.0154   | P        | 0.000284  | P        | 1.27e-05  | P        |
| GO0030521 | 2.22e-07 | P        | 5.89e-10  | P        | 1.16e-15  | P        |
| GO0042981 | 5.01e-11 | P        | 3.29e-19  | P        | 2.76e-29  | P        |
| GO0045893 | 0.0226   | P        | 0.000335  | P        | 2.33e-09  | P        |
| GO0045941 | 1.34e-08 | P        | 1.32e-17  | P        | 1.13e-34  | P        |

Supplementary Table 6: Individual results for each category 2 comparison for 6-mers. For each definition of a rare 6-mer, the P-value is given, which shows whether there was a statistically significant difference in rare 6-mer frequency between that GO protein set and the proto-oncoprotein set. The P/C columns indicate which set contained a higher frequency of rare 6-mers—the proto-oncoprotein set (P) or the control set (C). If this difference was not statistically significant, (n.s.) is appended.

| Accession | 0 times  |          | < 2 times |     | < 5 times |          |
|-----------|----------|----------|-----------|-----|-----------|----------|
|           | P-value  | P/C      | P-value   | P/C | P-value   | P/C      |
| GO0000122 | 1.71e-31 | P        | 3.5e-49   | P   | 4.59e-52  | P        |
| GO0000910 | 1.87e-33 | P        | 4.54e-35  | P   | 1.21e-19  | P        |
| GO0001525 | 2.6e-08  | P        | 2.06e-21  | P   | 1.05e-28  | P        |
| GO0001837 | 0.963    | P (n.s.) | 0.000831  | P   | 2.38e-10  | P        |
| GO0005975 | 9.82e-10 | C        | 3.76e-05  | C   | 0.184     | C (n.s.) |
| GO0006091 | 0.25     | P (n.s.) | 0.00558   | P   | 2.5e-06   | P        |
| GO0006096 | 0.000226 | C        | 0.000867  | C   | 0.00209   | C        |
| GO0006412 | 0.614    | P (n.s.) | 0.000394  | P   | 2.69e-06  | P        |
| GO0006446 | 7.78e-17 | P        | 4.52e-30  | P   | 1.11e-34  | P        |
| GO0006509 | 6.71e-07 | P        | 1.52e-18  | P   | 3.39e-14  | P        |
| GO0006928 | 4.85e-08 | P        | 5.3e-12   | P   | 8.98e-14  | P        |
| GO0006941 | 1.04e-09 | P        | 7.9e-06   | P   | 0.00618   | P        |
| GO0006959 | 4.91e-22 | P        | 5.29e-23  | P   | 2.06e-31  | P        |
| GO0006986 | 6.34e-12 | P        | 9.93e-15  | P   | 3.55e-12  | P        |
| GO0007049 | 2.51e-25 | P        | 4.9e-18   | P   | 2.4e-11   | P        |
| GO0007155 | 3.85e-09 | P        | 1.14e-13  | P   | 3.6e-12   | P        |
| GO0007229 | 0.0136   | P        | 2.93e-06  | P   | 3.22e-14  | P        |
| GO0007411 | 0.166    | P (n.s.) | 1.09e-05  | P   | 6.31e-10  | P        |
| GO0008360 | 3.63e-48 | P        | 1.19e-47  | P   | 5.68e-42  | P        |
| GO0015031 | 2.02e-13 | P        | 1.42e-12  | P   | 3.29e-12  | P        |
| GO0016310 | 0.133    | P (n.s.) | 0.000593  | P   | 0.000414  | P        |
| GO0016567 | 0.153    | P (n.s.) | 0.0039    | P   | 3.43e-06  | P        |
| GO0030048 | 3.97e-26 | P        | 2.18e-29  | P   | 1.68e-29  | P        |
| GO0030433 | 3.02e-05 | P        | 3.77e-10  | P   | 3.98e-10  | P        |
| GO0030521 | 2.7e-14  | P        | 4.31e-25  | P   | 5.53e-32  | P        |
| GO0042981 | 8.1e-19  | P        | 4.21e-19  | P   | 1.39e-10  | P        |
| GO0045893 | 1.61e-13 | P        | 2.7e-18   | P   | 1.72e-22  | P        |
| GO0045941 | 2.17e-46 | P        | 1.21e-69  | P   | 5.82e-71  | P        |

Supplementary Table 7: Individual results for each category 2 comparison for 7-mers. For each definition of a rare 7-mer, the P-value is given, which shows whether there was a statistically significant difference in rare 7-mer frequency between that GO protein set and the proto-oncoprotein set. The P/C columns indicate which set contained a higher frequency of rare 7-mers—the proto-oncoprotein set (P) or the control set (C). If this difference was not statistically significant, (n.s.) is appended.

| Accession | 0 times  |          | < 2 times |          | < 5 times |          |
|-----------|----------|----------|-----------|----------|-----------|----------|
|           | P-value  | P/C      | P-value   | P/C      | P-value   | P/C      |
| GO0000122 | 4.61e-28 | P        | 2.97e-31  | P        | 7.99e-25  | P        |
| GO0000910 | 8.39e-11 | P        | 0.00129   | P        | 0.00883   | P        |
| GO0001525 | 8.29e-14 | P        | 9.82e-19  | P        | 6.85e-16  | P        |
| GO0001837 | 0.000189 | P        | 8.59e-13  | P        | 1.11e-10  | P        |
| GO0005975 | 0.000462 | C        | 0.278     | C (n.s.) | 0.266     | C (n.s.) |
| GO0006091 | 0.138    | P (n.s.) | 0.0867    | P (n.s.) | 0.721     | P (n.s.) |
| GO0006096 | 6.2e-05  | C        | 0.0245    | C        | 0.0224    | C        |
| GO0006412 | 0.107    | P (n.s.) | 0.00359   | P        | 2e-05     | P        |
| GO0006446 | 1.54e-15 | P        | 3.35e-14  | P        | 4.26e-07  | P        |
| GO0006509 | 0.000294 | P        | 0.0133    | P        | 0.746     | C (n.s.) |
| GO0006928 | 7.52e-08 | P        | 4.97e-05  | P        | 0.00022   | P        |
| GO0006941 | 0.038    | P        | 0.305     | P (n.s.) | 0.351     | C (n.s.) |
| GO0006959 | 1.47e-11 | P        | 1.42e-12  | P        | 1.87e-12  | P        |
| GO0006986 | 0.000271 | P        | 0.000175  | P        | 0.0178    | P        |
| GO0007049 | 1.9e-08  | P        | 0.00905   | P        | 0.0241    | P        |
| GO0007155 | 6.3e-07  | P        | 0.000738  | P        | 0.00928   | P        |
| GO0007229 | 0.000107 | P        | 6.97e-10  | P        | 7.54e-07  | P        |
| GO0007411 | 0.000432 | P        | 7.01e-07  | P        | 6.13e-05  | P        |
| GO0008360 | 4.45e-21 | P        | 4.28e-13  | P        | 3.25e-06  | P        |
| GO0015031 | 5.11e-05 | P        | 0.00176   | P        | 0.0888    | P (n.s.) |
| GO0016310 | 0.432    | P (n.s.) | 0.0274    | P        | 0.854     | C (n.s.) |
| GO0016567 | 0.00287  | P        | 4.19e-09  | P        | 1.37e-05  | P        |
| GO0030048 | 1.85e-18 | P        | 1.04e-10  | P        | 6.97e-08  | P        |
| GO0030433 | 0.00102  | P        | 0.000451  | P        | 0.705     | P (n.s.) |
| GO0030521 | 2.83e-16 | P        | 1.25e-23  | P        | 1.67e-22  | P        |
| GO0042981 | 9.24e-07 | P        | 0.00567   | P        | 0.0283    | P        |
| GO0045893 | 1.24e-12 | P        | 1.92e-15  | P        | 1.62e-08  | P        |
| GO0045941 | 1.45e-44 | P        | 7.72e-41  | P        | 7.07e-33  | P        |

Supplementary Table 8: Complete data for the category 3 comparison. For each definition of a rare k-mer, and for each value of k (5, 6, and 7), the P-value is given, which shows whether there was a statistically significant difference in rare k-mer frequency between the control set and the proto-oncoprotein set. The P/C columns indicate which set contained a higher frequency of rare k-mers—the proto-oncoprotein set (P) or the control set (C).

|               | <b>0 times</b> |            | <b>≤ 2 times</b> |            | <b>≤ 5 times</b> |            |
|---------------|----------------|------------|------------------|------------|------------------|------------|
|               | <b>P-value</b> | <b>P/C</b> | <b>P-value</b>   | <b>P/C</b> | <b>P-value</b>   | <b>P/C</b> |
| <b>5-mers</b> | 0.00144        | P          | 5.16e-09         | P          | 8.89e-11         | P          |
| <b>6-mers</b> | 8.84e-10       | P          | 1.46e-13         | P          | 1.33e-15         | P          |
| <b>7-mers</b> | 2.75e-09       | P          | 3.22e-12         | P          | 2.79e-08         | P          |
